# Supplementary material for: Novel Fermented Ice Cream Formulations with Improved Antiradical and Anti-Inflammatory Features
Source: MDPI journal article supplement (doi:10.3390/fermentation9020117), 2023-01-26
Supplement: s1 [file s1]

Archive with 3 entries (3 files):
- fermentation-2163465-supplementary.pdf
- supplementary table S1.pdf
- Supplementary Table S2.pdf
