# Supplementary material for: Novel Fermented Ice Cream Formulations with Improved Antiradical and Anti-Inflammatory Features
Source: MDPI journal article supplement (doi:10.3390/fermentation9020117), 2023-01-26
Supplement: s1 [file s1 › fermentation-2163465-supplementary.pdf]

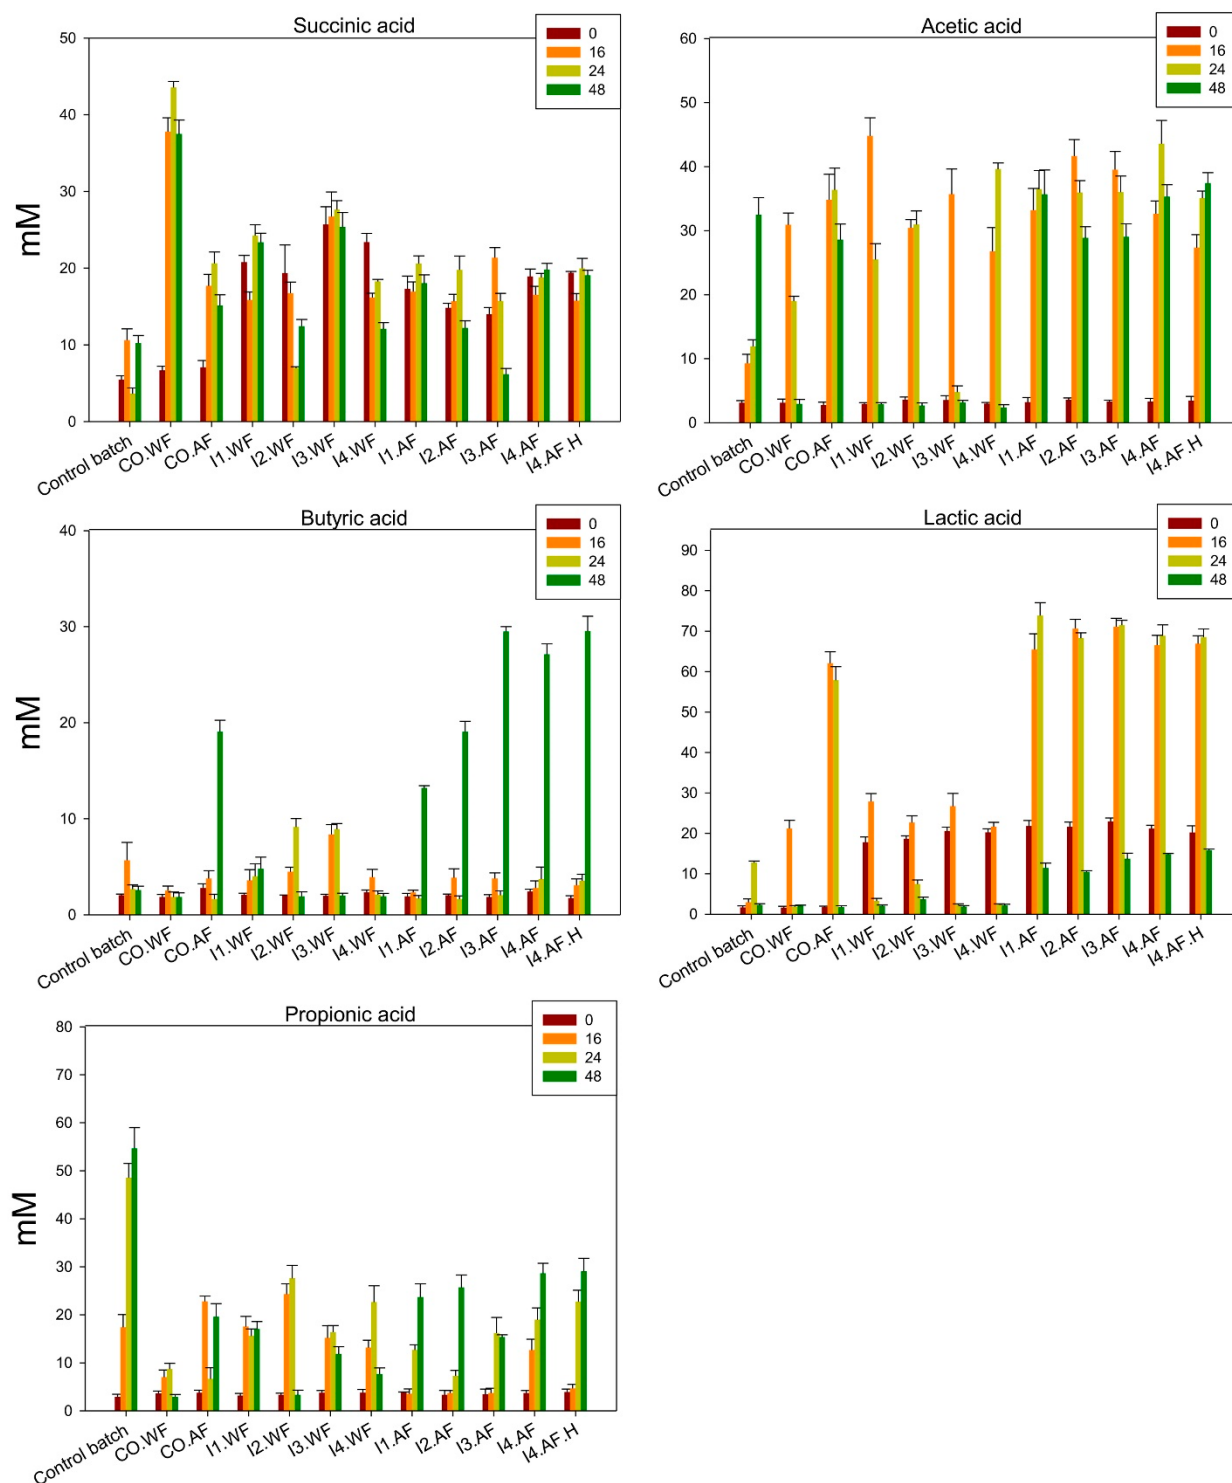

Figure S1. Concentrations (mM) of main organic acids in fecal batch culture over 48 h of incubation. Fecal batches were supplemented with ice creams stored one month at  $-20^{\circ}\text{C}$ , and a batch culture without supplementation was used as negative control.
