# Supplementary material for: Novel Fermented Ice Cream Formulations with Improved Antiradical and Anti-Inflammatory Features
Source: MDPI journal article supplement (doi:10.3390/fermentation9020117), 2023-01-26
Supplement: s1 [file s1 › supplementary table S1.pdf]

Supplementary Table S1. Calibration data used for the HPLC quantification of sugars and lactic acid.

| Standards   | Linearity (g L <sup>-1</sup> ) | Calibration curve  | Correlation (r <sup>2</sup> ) | LOQ<br>(g L <sup>-1</sup> ) | LOD<br>(g L <sup>-1</sup> ) |
|-------------|--------------------------------|--------------------|-------------------------------|-----------------------------|-----------------------------|
| Glucose     | 0.5-15                         | y=0.1625x - 0.0228 | 0.997                         | 0.5                         | 0.1                         |
| Galactose   | 0.5-15                         | y=0.3681x - 0.0815 | 0.998                         | 0.5                         | 0.05                        |
| Lactose     | 0.5-15                         | y=0.3109x - 0.0107 | 0.999                         | 0.5                         | 0.2                         |
| Lactic acid | 0.5-15                         | y=14.358x - 0.8472 | 0.999                         | 0.5                         | 0.05                        |
