# Supplementary material for: Novel Fermented Ice Cream Formulations with Improved Antiradical and Anti-Inflammatory Features
Source: MDPI journal article supplement (doi:10.3390/fermentation9020117), 2023-01-26
Supplement: s1 [file s1 › Supplementary Table S2.pdf]

Supplementary Table S2. Calibration data used for the HPLC quantification of short chain fatty acids (SCFA)\*.

| Compound       | Correlation ( $r^2$ ) | LOQ (mM) | LOD (mM) |
|----------------|-----------------------|----------|----------|
| Lactic acid    | 0.993                 | 1.03     | 0.30     |
| Acetic acid    | 0.982                 | 1.27     | 0.46     |
| Propionic acid | 0.985                 | 1.13     | 0.34     |
| Butyric acid   | 0.981                 | 1.21     | 0.44     |
| Succinic acid  | 0.994                 | 1.05     | 0.31     |

\*The regression line was determined with the least-square fit, also calculating the relative coefficient ( $r^2$ ). Limits of detection (LOD) and quantification (LOQ) were determined using signal to noise ratio with 3:1 for LOD and 10:1 for LOQ.
